# Supplementary material for: ZIC2 Is Essential for Maintenance of Latency and Is a Target of an Immediate Early Protein during Kaposi's Sarcoma-Associated Herpesvirus Lytic Reactivation
Source: PubMed Central journal article supplement (PMC5640855; doi:10.1128/jvi.00980-17), 2017-10-13
Supplement: JVI.00980-17_zjv999183038s1.pdf [file JVI.00980-17_zjv999183038s1.pdf]

**Table S1. Proteins with spectral count >10 and fold change >1.4 between samples from untreated and Dox-treated TReX-K-Rta His-Ubiquitin 293 cells.**

| #  | Protein name                                                                                | Spectral count |       |
|----|---------------------------------------------------------------------------------------------|----------------|-------|
|    |                                                                                             | No Dox         | + Dox |
| 1  | Transcriptional repressor protein YY1 OS=Homo sapiens GN=YY1 PE=1 SV=2                      | 1105           | 755   |
| 2  | Zinc finger CCCH domain-containing protein 18 OS=Homo sapiens GN=ZC3H18 PE=1 SV=2           | 662            | 428   |
| 3  | 60S ribosomal protein L27a OS=Homo sapiens GN=RPL27A PE=1 SV=2                              | 329            | 203   |
| 4  | RNA-binding protein with serine-rich domain 1 (Fragment) OS=Homo sapiens GN=RNPS1 PE=1 SV=1 | 256            | 178   |
| 5  | CLK4-associating serine/arginine-rich protein OS=Homo sapiens GN=CLASRP PE=1 SV=1           | 185            | 96    |
| 6  | Serine/arginine-rich splicing factor 6 OS=Homo sapiens GN=SRSF6 PE=1 SV=2                   | 135            | 194   |
| 7  | Histone H2A type 2-C OS=Homo sapiens GN=HIST2H2AC PE=1 SV=4                                 | 134            | 92    |
| 8  | Bcl-2-associated transcription factor 1 OS=Homo sapiens GN=BCLAF1 PE=1 SV=1                 | 132            | 200   |
| 9  | Histone H2B type 1-K OS=Homo sapiens GN=HIST1H2BK PE=1 SV=3                                 | 111            | 75    |
| 10 | Transcription factor GATA-6 OS=Homo sapiens GN=GATA6 PE=1 SV=2                              | 92             | 57    |
| 11 | Protein FAM76B OS=Homo sapiens GN=FAM76B PE=1 SV=1                                          | 88             | 60    |
| 12 | Nucleolar and coiled-body phosphoprotein 1 OS=Homo sapiens GN=NOLC1 PE=1 SV=2               | 77             | 113   |
| 13 | Histone-binding protein RBBP7 OS=Homo sapiens GN=RBBP7 PE=1 SV=1                            | 71             | 125   |
| 14 | Nucleolar and coiled-body phosphoprotein 1 OS=Homo sapiens GN=NOLC1 PE=1 SV=2               | 66             | 163   |
| 15 | E3 SUMO-protein ligase CBX4 OS=Homo sapiens GN=CBX4 PE=1 SV=3                               | 64             | 40    |
| 16 | Chromodomain-helicase-DNA-binding protein 8 OS=Homo sapiens GN=CHD8 PE=1 SV=5               | 62             | 36    |
| 17 | Zinc finger protein ZIC 2 OS=Homo sapiens GN=ZIC2 PE=1 SV=2                                 | 61             | 26    |
| 18 | Pinin OS=Homo sapiens GN=PNN PE=1 SV=4                                                      | 56             | 19    |
| 19 | Zinc finger protein ZIC 5 OS=Homo sapiens GN=ZIC5 PE=1 SV=2                                 | 55             | 33    |
| 20 | Zinc finger protein 281 OS=Homo sapiens GN=ZNF281 PE=1 SV=1                                 | 51             | 21    |
| 21 | RNA-binding protein 33 OS=Homo sapiens GN=RBM33 PE=1 SV=3                                   | 50             | 21    |
| 22 | Zinc transporter ZIP10 OS=Homo sapiens GN=SLC39A10 PE=1 SV=2                                | 49             | 31    |
| 23 | Nucleolin OS=Homo sapiens GN=NCL PE=1 SV=3                                                  | 47             | 76    |

|    |                                                                                                          |    |    |
|----|----------------------------------------------------------------------------------------------------------|----|----|
| 24 | Calcium homeostasis endoplasmic reticulum protein OS=Homo sapiens GN=CHERP PE=1 SV=3                     | 44 | 63 |
| 25 | Thyroid hormone receptor-associated protein 3 OS=Homo sapiens GN=THRAP3 PE=1 SV=2                        | 42 | 69 |
| 26 | Nucleolin OS=Homo sapiens GN=NCL PE=1 SV=3                                                               | 40 | 5  |
| 27 | p21-activated protein kinase-interacting protein 1 OS=Homo sapiens GN=PAK1IP1 PE=1 SV=2                  | 40 | 23 |
| 28 | Zinc finger protein 485 OS=Homo sapiens GN=ZNF485 PE=2 SV=1                                              | 39 | 25 |
| 29 | Zinc finger and SCAN domain-containing protein 26 OS=Homo sapiens GN=ZSCAN26 PE=1 SV=1                   | 38 | 26 |
| 30 | 40S ribosomal protein S7 OS=Homo sapiens GN=RPS7 PE=1 SV=1                                               | 35 | 22 |
| 31 | Zinc transporter ZIP6 OS=Homo sapiens GN=SLC39A6 PE=1 SV=3                                               | 32 | 13 |
| 32 | Sentrin-specific protease 1 OS=Homo sapiens GN=SENP1 PE=1 SV=2                                           | 29 | 19 |
| 33 | Leucine-rich repeat and calponin homology domain-containing protein 1 OS=Homo sapiens GN=LRCH1 PE=1 SV=3 | 28 | 16 |
| 34 | CLK4-associating serine/arginine rich protein OS=Homo sapiens GN=CLASRP PE=1 SV=4                        | 28 | 50 |
| 35 | RNA/RNP complex-1-interacting phosphatase OS=Homo sapiens GN=DUSP11 PE=1 SV=1                            | 27 | 17 |
| 36 | Hepatoma-derived growth factor-related protein 2 OS=Homo sapiens GN=HDGFRP2 PE=1 SV=1                    | 26 | 40 |
| 37 | Zinc finger protein 239 OS=Homo sapiens GN=ZNF239 PE=2 SV=3                                              | 26 | 15 |
| 38 | E3 ubiquitin-protein ligase Arkadia OS=Homo sapiens GN=RNF111 PE=1 SV=3                                  | 25 | 13 |
| 39 | Transcription factor AP-2-alpha OS=Homo sapiens GN=TFAP2A PE=1 SV=1                                      | 25 | 17 |
| 40 | Actin, alpha cardiac muscle 1 OS=Homo sapiens GN=ACTC1 PE=1 SV=1                                         | 24 | 16 |
| 41 | Zinc finger protein 655 OS=Homo sapiens GN=ZNF655 PE=1 SV=3                                              | 24 | 15 |
| 42 | NADH dehydrogenase [ubiquinone] 1 beta subcomplex subunit 3 OS=Homo sapiens GN=NDUFB3 PE=1 SV=3          | 24 | 14 |
| 43 | Zinc finger protein 649 OS=Homo sapiens GN=ZNF649 PE=1 SV=1                                              | 24 | 14 |
| 44 | Putative RNA-binding protein Luc7-like 2 OS=Homo sapiens GN=LUC7L2 PE=1 SV=2                             | 22 | 11 |
| 45 | Dual specificity tyrosine-phosphorylation-regulated kinase 1A OS=Homo sapiens GN=DYRK1A PE=1 SV=2        | 21 | 14 |
| 46 | Exportin-2 OS=Homo sapiens GN=CSE1L PE=1 SV=3                                                            | 20 | 47 |
| 47 | Glyceraldehyde-3-phosphate dehydrogenase OS=Homo sapiens GN=GAPDH PE=1 SV=1                              | 20 | 7  |
| 48 | Zinc finger protein 417 OS=Homo sapiens GN=ZNF417 PE=2 SV=2                                              | 20 | 14 |
| 49 | Splicing factor, proline- and glutamine-rich OS=Homo sapiens GN=SFPQ PE=1 SV=2                           | 18 | 3  |
| 50 | Heat shock protein beta-1 OS=Homo sapiens GN=HSPB1 PE=1 SV=2                                             | 18 | 5  |
| 51 | Homeobox protein Hox-A9 OS=Homo sapiens GN=HOXA9 PE=1 SV=4                                               | 16 | 4  |
| 52 | Prickle-like protein 3 OS=Homo sapiens GN=PRICKLE3 PE=1 SV=2                                             | 15 | 8  |
| 53 | Keratin, type II cytoskeletal 1 OS=Homo sapiens GN=KRT1 PE=1 SV=6                                        | 15 | 10 |

|    |                                                                                                                   |    |    |
|----|-------------------------------------------------------------------------------------------------------------------|----|----|
| 54 | Transducin-like enhancer protein 3 OS=Homo sapiens GN=TLE3 PE=1 SV=1                                              | 15 | 30 |
| 55 | Superoxide dismutase [Mn], mitochondrial OS=Homo sapiens GN=SOD2 PE=1 SV=2                                        | 15 | 31 |
| 56 | Nucleoside diphosphate-linked moiety X motif 19, mitochondrial OS=Homo sapiens GN=NUDT19 PE=1 SV=1                | 15 | 7  |
| 57 | Homeobox protein DLX-2 OS=Homo sapiens GN=DLX2 PE=1 SV=2                                                          | 15 | 8  |
| 58 | Leucine-rich repeat-containing protein 59 OS=Homo sapiens GN=LRRRC59 PE=1 SV=1                                    | 14 | 4  |
| 59 | Keratin, type I cytoskeletal 9 OS=Homo sapiens GN=KRT9 PE=1 SV=3                                                  | 14 | 6  |
| 60 | Transcription factor MafB OS=Homo sapiens GN=MAFB PE=1 SV=2                                                       | 14 | 4  |
| 61 | Plasminogen activator inhibitor 1 RNA-binding protein OS=Homo sapiens GN=SERBP1 PE=1 SV=2                         | 14 | 22 |
| 62 | Homeobox protein SIX1 OS=Homo sapiens GN=SIX1 PE=1 SV=1                                                           | 14 | 9  |
| 63 | DNA-dependent protein kinase catalytic subunit OS=Homo sapiens GN=PRKDC PE=1 SV=3                                 | 13 | 24 |
| 64 | Calnexin OS=Homo sapiens GN=CANX PE=1 SV=2                                                                        | 13 | 19 |
| 65 | Keratin, type II cytoskeletal 2 epidermal OS=Homo sapiens GN=KRT2 PE=1 SV=2                                       | 12 | 3  |
| 66 | Serine/arginine-rich splicing factor 3 OS=Homo sapiens GN=SRSF3 PE=1 SV=1                                         | 11 | 5  |
| 67 | Arginine-glutamic acid dipeptide repeats protein OS=Homo sapiens GN=RERE PE=1 SV=2                                | 11 | 4  |
| 68 | Peroxisome proliferator-activated receptor gamma coactivator-related protein 1 OS=Homo sapiens GN=PPRC1 PE=1 SV=1 | 11 | 1  |
| 69 | Alpha-S1-casein OS=Bos taurus GN=CSN1S1 PE=1 SV=2                                                                 | 11 | 3  |
| 70 | Serine/threonine-protein kinase PRP4 homolog OS=Homo sapiens GN=PRPF4B PE=1 SV=3                                  | 10 | 16 |
| 71 | Pre-mRNA-splicing factor CWC22 homolog OS=Homo sapiens GN=CWC22 PE=1 SV=3                                         | 9  | 13 |
| 72 | Stromal interaction molecule 1 OS=Homo sapiens GN=STIM1 PE=1 SV=3                                                 | 9  | 18 |
| 73 | Protein transport protein Sec16A OS=Homo sapiens GN=SEC16A PE=1 SV=1                                              | 9  | 13 |
| 74 | Queuine tRNA-ribosyltransferase subunit QTRTD1 OS=Homo sapiens GN=QTRTD1 PE=1 SV=1                                | 9  | 14 |
| 75 | G patch domain-containing protein 8 OS=Homo sapiens GN=GPATCH8 PE=1 SV=2                                          | 8  | 16 |
| 76 | Lamina-associated polypeptide 2, isoforms beta/gamma OS=Homo sapiens GN=TMPO PE=1 SV=2                            | 8  | 17 |
| 77 | Zinc phosphodiesterase ELAC protein 2 (Fragment) OS=Homo sapiens GN=ELAC2 PE=1 SV=2                               | 6  | 11 |
| 78 | Cyclic AMP-responsive element-binding protein 5 OS=Homo sapiens GN=CREB5 PE=1 SV=3                                | 2  | 15 |
| 79 | Titin OS=Homo sapiens GN=TTN PE=1 SV=1                                                                            | 1  | 13 |
| 80 | Serine/arginine repetitive matrix protein 2 (Fragment) OS=Homo sapiens GN=SRRM2 PE=1 SV=1                         | 0  | 18 |
| 81 | DNA topoisomerase I, mitochondrial OS=Homo sapiens GN=TOP1MT PE=1 SV=1                                            | 0  | 20 |
| 82 | Methyl-CpG-binding protein 2 OS=Homo sapiens GN=MECP2 PE=1 SV=1                                                   | 0  | 15 |
